# Supplementary material
Source: Springer Nature journal article supplement (https://www.springermedizin.de/resource/supplementary/12885_2007_955_MOESM2_ESM.pdf/9471136)
Supplement: MOESM2 [file 9471136]

| #   | Pathology     | BRCA1 status |         |      |       |     | Classification                                                |
|-----|---------------|--------------|---------|------|-------|-----|---------------------------------------------------------------|
|     |               | Mut          | LOH     | Meth | RNA   | IHC |                                                               |
| 186 | Ser/Undiff-HG | G            | NO      | U    | 0.44  | -   | BRCA1 loss through germline or somatic mutation               |
| 223 | Serous - HG   | G            | MSI     | U    | 0.14  | -   |                                                               |
| 329 | Serous - HG   | G            | LOH     | U    | 0.02  | -   |                                                               |
| 293 | Serous - HG   | G            | LOH     | U    | 0.65  | -   |                                                               |
| 283 | Serous - HG   | G            | LOH     | U    | 3.1   | -   |                                                               |
| 239 | Serous - HG   | G            | LOH     | U    | 0.16  | -   |                                                               |
| 336 | Ser/Undiff-HG | G            | LOH     | U    | 0.1   | -   |                                                               |
| 327 | Serous - HG   | G            | LOH     | U    | 0.04  | -   |                                                               |
| 379 | Serous - HG   | S            | LOH     | U    | 0.07  | -   |                                                               |
| 217 | Serous - HG   | N            | LOH     | M    | 0.08  | -   |                                                               |
| 330 | Serous - HG   | N            | LOH     | M    | 0.07  | -   |                                                               |
| 332 | Serous - HG   | N            | LOH     | M    | 0.08  | -   |                                                               |
| 388 | Serous - HG   | N            | LOH     | M    | 0.67  | -   |                                                               |
| 363 | Serous - HG   | N            | LOH     | M    | 0.27  | -   |                                                               |
| 161 | Ser/Undiff-HG | N            | LOH     | M    | 0.09  | -   |                                                               |
| 344 | Serous - HG   | N            | LOH/MSI | M    | 0.3   | -   |                                                               |
| 345 | Serous - HG   | N            | MSI     | M    | 0.41  | +   |                                                               |
| 384 | Serous - HG   | N            | LOH     | M    | 0.15  | -   | Equivocal BRCA1 loss                                          |
| 201 | Ser/Undiff-HG | N            | LOH     | U    | 1.87  | -   |                                                               |
| 178 | Serous - HG   | N            | LOH     | U    | 0.42  | -   |                                                               |
| 229 | Serous - HG   | N            | LOH     | N/A  | 0.19  | -   |                                                               |
| 309 | Serous - HG   | N            | NO      | U    | 0.56  | -   |                                                               |
| 394 | Serous - HG   | N            | LOH     | U    | 0.89  | -   |                                                               |
| 195 | Serous - HG   | N            | N.A.    | U    | 1.53  | +   |                                                               |
| 236 | Serous - HG   | N            | LOH     | U    | 1.69  | +   |                                                               |
| 280 | Ser/Undiff-HG | N            | LOH     | U    | 3.11  | +   |                                                               |
| 172 | Serous - HG   | N            | LOH     | U    | 2.21  | +   |                                                               |
| 254 | Serous - HG   | N            | LOH     | U    | 0.48  | +   |                                                               |
| 319 | Serous - HG   | N            | LOH     | U    | 0.62  | +   |                                                               |
| 372 | Serous - HG   | N            | LOH     | U    | 2.02  | +   |                                                               |
| 208 | Undiff - HG   | N            | LOH     | U    | 0.81  | +   |                                                               |
| 273 | Undiff - HG   | N            | LOH     | U    | 1.54  | +   |                                                               |
| 240 | Undiff - HG   | N            | NO      | U    | 0.41  | +   |                                                               |
| 297 | Serous - HG   | N            | NO      | U    | 1.766 | +   |                                                               |
| 366 | Serous - HG   | N            | LOH     | U    | 2.25  | +   | BRCA2 loss through mutation                                   |
| 163 | Serous - HG   | N            | LOH     | U    | 2.08  | +   |                                                               |
| 305 | Serous - HG   | N            | LOH     | U    | 1.54  | -   |                                                               |
| 212 | Serous - HG   | N            | LOH     | U    | 1.22  | +   | clear cell, endometriod, and low grade serous (No BRCA1 loss) |
| 198 | Clear cell    | N            | NO      | U    | 1.55  | +   |                                                               |
| 213 | Clear cell    | N            | NO      | U    | 2.9   | +   |                                                               |
| 219 | Clear cell    | N            | NO      | U    | 0.58  | +   |                                                               |
| 392 | Clear cell    | N            | NO      | U    | 1.51  | +   |                                                               |
| 242 | Endo - G2     | N            | NO      | U    | 1.02  | +   |                                                               |
| 281 | Endo - G2     | N            | NO      | U    | 1.35  | +   |                                                               |
| 334 | Endo - G1     | N            | NO      | U    | 1.18  | +   |                                                               |
| 156 | Endo - G2     | N            | MSI     | U    | 1.42  | +   |                                                               |
| 343 | Endo - G2     | N            | NO      | U    | 0.27  | +   |                                                               |
| 221 | Serous - LG   | N            | LOH     | U    | 1.46  | +   |                                                               |
| 324 | Serous - LG   | N            | NO      | U    | 0.5   | +   |                                                               |
